# Supplementary material for: Solid Solutions of Lindbergite–Glushinskite Series: Synthesis, Ionic Substitutions, Phase Transformation and Crystal Morphology
Source: MDPI journal article supplement (doi:10.3390/ijms232314734), 2022-11-25
Supplement: s1 [file s1]

Table S1. Indexing of  $\text{MnC}_2\text{O}_4 \cdot 2\text{H}_2\text{O}$  (NC series) in  $\alpha'$  and  $\alpha''$  settings (C2/c space group).

| d exp., Å for<br>$\text{MnC}_2\text{O}_4 \cdot 2\text{H}_2\text{O}$<br>(NC series, our<br>data) | $\alpha'$ setting, sp. gr.<br>C2/c, $a = 11.999\text{\AA}$ , $b$<br>$= 5.642\text{\AA}$ , $c = 9.974\text{\AA}$ ,<br>$\beta = 128.34^\circ$ * |   |   | $\alpha''$ setting, sp. gr.<br>C2/c, $a = 11.999\text{\AA}$ ,<br>$b = 5.640\text{\AA}$ , $c =$<br>$9.734\text{\AA}$ , $\beta =$<br>$126.55^\circ$ * |   |   | d exp., Å for<br>lindbergite [5] |
|-------------------------------------------------------------------------------------------------|-----------------------------------------------------------------------------------------------------------------------------------------------|---|---|-----------------------------------------------------------------------------------------------------------------------------------------------------|---|---|----------------------------------|
|                                                                                                 | h                                                                                                                                             | k | l | h                                                                                                                                                   | k | l |                                  |
| 4.809                                                                                           | -2                                                                                                                                            | 0 | 2 | 2                                                                                                                                                   | 0 | 0 | 4.813                            |
| 4.697                                                                                           | 2                                                                                                                                             | 0 | 0 | -2                                                                                                                                                  | 0 | 2 | 4.704                            |
| 3.911                                                                                           | 0                                                                                                                                             | 0 | 2 | 0                                                                                                                                                   | 0 | 2 | 3.909                            |
| 3.673                                                                                           | -1                                                                                                                                            | 1 | 2 | 1                                                                                                                                                   | 1 | 1 | 3.663                            |
| 3.631                                                                                           | 1                                                                                                                                             | 1 | 1 | -1                                                                                                                                                  | 1 | 2 | 3.626                            |
| 2.997                                                                                           | -4                                                                                                                                            | 0 | 2 | -4                                                                                                                                                  | 0 | 2 | 2.998                            |
| 2.821                                                                                           | 0                                                                                                                                             | 2 | 0 | 0                                                                                                                                                   | 2 | 0 | 2.816                            |
| 2.682                                                                                           | -1                                                                                                                                            | 1 | 3 | 1                                                                                                                                                   | 1 | 2 | 2.678                            |
| 2.654                                                                                           | 1                                                                                                                                             | 1 | 2 | -1                                                                                                                                                  | 1 | 3 | 2.654                            |
|                                                                                                 | 0                                                                                                                                             | 2 | 1 | 0                                                                                                                                                   | 2 | 1 |                                  |
| 2.408                                                                                           | -4                                                                                                                                            | 0 | 4 | 4                                                                                                                                                   | 0 | 0 |                                  |
| 2.371                                                                                           | 2                                                                                                                                             | 0 | 2 | -2                                                                                                                                                  | 0 | 4 | 2.370                            |
| 2.352                                                                                           | 4                                                                                                                                             | 0 | 0 | -4                                                                                                                                                  | 0 | 4 | 2.352                            |
| 2.287                                                                                           | 0                                                                                                                                             | 2 | 2 | 0                                                                                                                                                   | 2 | 2 | 2.285                            |
| 1.996                                                                                           | -4                                                                                                                                            | 2 | 3 | -4                                                                                                                                                  | 2 | 1 | 1.993                            |
| 1.949                                                                                           | -6                                                                                                                                            | 0 | 4 | -6                                                                                                                                                  | 0 | 2 | 1.947                            |
| 1.925                                                                                           | -6                                                                                                                                            | 0 | 2 | -6                                                                                                                                                  | 0 | 4 | 1.925                            |
| 1.845                                                                                           | -1                                                                                                                                            | 3 | 1 | 1                                                                                                                                                   | 3 | 0 | 1.843                            |
|                                                                                                 | 1                                                                                                                                             | 3 | 0 | -1                                                                                                                                                  | 3 | 1 |                                  |
| 1.824                                                                                           | -5                                                                                                                                            | 1 | 5 | -3                                                                                                                                                  | 1 | 5 |                                  |
|                                                                                                 |                                                                                                                                               |   |   | 5                                                                                                                                                   | 1 | 0 |                                  |
| 1.499                                                                                           | -8                                                                                                                                            | 0 | 4 | -8                                                                                                                                                  | 0 | 4 |                                  |
| 1.373                                                                                           | -1                                                                                                                                            | 1 | 6 | 1                                                                                                                                                   | 1 | 5 |                                  |
|                                                                                                 | -2                                                                                                                                            | 4 | 1 | -2                                                                                                                                                  | 4 | 1 |                                  |
|                                                                                                 | 6                                                                                                                                             | 2 | 0 | -6                                                                                                                                                  | 2 | 6 |                                  |

\* Unit cell parameters of  $\text{MnC}_2\text{O}_4 \cdot 2\text{H}_2\text{O}$ , NC series, our data

Table S2. Indexing of  $\text{MgC}_2\text{O}_4 \cdot 2\text{H}_2\text{O}$  (NC series) in  $C2/c$  and  $Fddd$  space groups.

| d exp., Å for<br>$\text{MgC}_2\text{O}_4 \cdot 2\text{H}_2\text{O}$<br>(NC series, our<br>data) | Sp. gr. $C2/c$ , $a =$<br>$12.695\text{Å}$ , $b = 5.390\text{Å}$ ,<br>$c = 9.983\text{Å}$ , $\beta =$<br>$129.47^\circ$ * |    |    | Sp. gr. $Fddd$ , $a =$<br>$12.698\text{Å}$ , $b =$<br>$5.390\text{Å}$ , $c =$<br>$15.413^\circ$ ** |   |   | d exp., Å for<br>glushinskite<br>[3] |
|-------------------------------------------------------------------------------------------------|---------------------------------------------------------------------------------------------------------------------------|----|----|----------------------------------------------------------------------------------------------------|---|---|--------------------------------------|
|                                                                                                 | h                                                                                                                         | k  | l  | h                                                                                                  | k | l |                                      |
| 4.894                                                                                           | 2                                                                                                                         | 0  | 0  | 2                                                                                                  | 0 | 2 | 4.89                                 |
|                                                                                                 | 2                                                                                                                         | 0  | -2 |                                                                                                    |   |   |                                      |
| 4.717                                                                                           | 1                                                                                                                         | 1  | 0  | 1                                                                                                  | 1 | 1 |                                      |
|                                                                                                 | 1                                                                                                                         | -1 | -1 |                                                                                                    |   |   |                                      |
| 3.850                                                                                           | 0                                                                                                                         | 0  | 2  | 0                                                                                                  | 0 | 4 | 3.849                                |
| 3.251                                                                                           | 3                                                                                                                         | -1 | -1 | 3                                                                                                  | 1 | 1 |                                      |
|                                                                                                 | 3                                                                                                                         | -1 | -2 |                                                                                                    |   |   |                                      |
| 3.174                                                                                           | 4                                                                                                                         | 0  | -2 | 4                                                                                                  | 0 | 0 | 3.179                                |
| 2.544                                                                                           | 0                                                                                                                         | 2  | 1  | 0                                                                                                  | 2 | 2 | 2.541                                |
| 2.481                                                                                           | 2                                                                                                                         | -2 | 1  | 2                                                                                                  | 2 | 0 | 2.492                                |
| 2.449                                                                                           | 4                                                                                                                         | 0  | 0  | 4                                                                                                  | 0 | 4 |                                      |
|                                                                                                 | 4                                                                                                                         | 0  | -4 |                                                                                                    |   |   |                                      |
| 2.381                                                                                           | 2                                                                                                                         | 0  | 2  | 2                                                                                                  | 0 | 6 | 2.379                                |
|                                                                                                 | 2                                                                                                                         | 0  | -4 |                                                                                                    |   |   |                                      |
| 2.086                                                                                           | 2                                                                                                                         | 2  | 1  | 2                                                                                                  | 2 | 4 | 2.086                                |
|                                                                                                 | 2                                                                                                                         | -2 | -3 |                                                                                                    |   |   |                                      |
| 2.041                                                                                           | 6                                                                                                                         | 0  | -2 | 6                                                                                                  | 0 | 2 | 2.039                                |
|                                                                                                 | 6                                                                                                                         | 0  | -4 |                                                                                                    |   |   |                                      |
| 1.859                                                                                           | 0                                                                                                                         | 2  | 3  | 0                                                                                                  | 2 | 6 | 1.861                                |
| 1.767                                                                                           | 1                                                                                                                         | 3  | 0  | 1                                                                                                  | 3 | 1 |                                      |
|                                                                                                 | 1                                                                                                                         | -3 | -1 |                                                                                                    |   |   |                                      |
| 1.643                                                                                           | 3                                                                                                                         | -3 | -1 | 3                                                                                                  | 3 | 1 |                                      |
|                                                                                                 | 3                                                                                                                         | -3 | -2 |                                                                                                    |   |   |                                      |
| 1.604                                                                                           | 4                                                                                                                         | 2  | 1  | 4                                                                                                  | 2 | 6 |                                      |
|                                                                                                 | 4                                                                                                                         | -2 | -5 |                                                                                                    |   |   |                                      |
| 1.588                                                                                           | 8                                                                                                                         | 0  | -4 | 8                                                                                                  | 0 | 0 |                                      |
| 1.528                                                                                           | 6                                                                                                                         | -2 | -1 | 6                                                                                                  | 2 | 4 | 1.526                                |
|                                                                                                 | 6                                                                                                                         | -2 | -5 |                                                                                                    |   |   |                                      |
| 1.461                                                                                           | 5                                                                                                                         | -3 | -2 | 5                                                                                                  | 3 | 1 |                                      |
|                                                                                                 | 5                                                                                                                         | -3 | -3 |                                                                                                    |   |   |                                      |
| 1.348                                                                                           | 0                                                                                                                         | 4  | 0  | 0                                                                                                  | 4 | 0 |                                      |

\* Unit cell parameters of  $\text{MgC}_2\text{O}_4 \cdot 2\text{H}_2\text{O}$ , NC series, our data\*\*  $a_{\text{orth}} = a_{\text{mon}}$ ,  $b_{\text{orth}} = b_{\text{mon}}$ ,  $c_{\text{orth}} = 2c_{\text{mon}} * \cos(\beta_{\text{mon}} - 90^\circ)$

Table S3. Chemical composition of crystals of lindbergite – glushinskite solid solution series at various Mg/(Mg+Mn) ratios in solution by EDX.

| Mg% in solution  | Mg/(Mg+Mn) % in crystals, average | Standard deviation of Mg/(Mg+Mn) % in crystals | Mg% in solution  | Mg/(Mg+Mn) % in crystals | Standard deviation of Mg/(Mg+Mn)% in crystals |
|------------------|-----------------------------------|------------------------------------------------|------------------|--------------------------|-----------------------------------------------|
| <b>S series</b>  |                                   |                                                | <b>N series</b>  |                          |                                               |
| 0.0              | 0.0                               | 0.0                                            | 0.0              | 0.0                      | 0.0                                           |
| 10.0             | 9.7                               | 6.1                                            | 10.0             | 19.3                     | 6.5                                           |
| 20.0             | 17.8                              | 5.0                                            | 20.0             | 25.8                     | 7.2                                           |
| 30.0             | 32.0                              | 2.3                                            | 30.0             | 45.8                     | 5.1                                           |
| 40.0             | 38.3                              | 9.4                                            | 40.0             | 53.1                     | 9.6                                           |
| 50.0             | 70.7                              | 12.2                                           | 50.0             | 70.0                     | 0.6                                           |
| 60.0             | 85.2                              | 7.9                                            | 60.0             | 82.4                     | 4.0                                           |
| 65.0             | 83.0                              | 8.4                                            | 65.0             | 77.6                     | 19.8                                          |
| 70.0             | 79.9                              | 12.4                                           | 70.0             | 86.7                     | 5.3                                           |
| 75.0             | 78.2                              | 5.6                                            | 75.0             | 87.8                     | 1.3                                           |
| 80.0             | 87.6                              | 6.5                                            | 80.0             | 93.1                     | 3.0                                           |
| 85.0             | 90.9                              | 1.7                                            |                  |                          |                                               |
| 90.0             | 86.0                              | 8.9                                            | 90.0             | 96.0                     | 1.4                                           |
| 100.0            | 100.0                             | 0.0                                            | 100.0            | 100.0                    | 0.0                                           |
| <b>SC series</b> |                                   |                                                | <b>NC series</b> |                          |                                               |
| 0.0              | 0.0                               | 0.0                                            | 0.0              | 0.0                      | 0                                             |
| 10.0             | 15.4                              | 1.3                                            | 10.0             | 21.3                     | 3.9                                           |
| 20.0             | 26.7                              | 5.5                                            | 20.0             | 25.8                     | 6.0                                           |
| 30.0             | 31.0                              | 8.7                                            | 30.0             | 33.0                     | 4.4                                           |
| 40.0             | 50.8                              | 7.6                                            | 40.0             | 39.1                     | 6.9                                           |
| 50.0             | 61.1                              | 4.4                                            | 50.0             | 54.8                     | 2.8                                           |
| 60.0             | 69.0                              | 5.0                                            | 60.0             | 66.1                     | 17.5                                          |
| 70.0             | 79.0                              | 3.3                                            | 70.0             | 80.2                     | 5.1                                           |
| 75.0             | 64.8                              | 8.0                                            |                  |                          |                                               |
| 80.0             | 79.9                              | 6.7                                            | 80.0             | 87.8                     | 5.2                                           |
| 90.0             | 89.4                              | 0.8                                            | 90.0             | 85.3                     | 14.4                                          |
| 100.0            | 100.0                             | 0.0                                            | 100.0            | 100.0                    | 0.0                                           |
